# Supplementary material for: Simulation of avascular tumor growth by agent-based game model involving phenotype-phenotype interactions
Source: PubMed Central journal article supplement (PMC4673614; doi:10.1038/srep17992), 2015-12-09
Supplement: srep17992-s1.pdf [file srep17992-s1.pdf]

# Simulation of avascular tumor growth by agent-based game model involving phenotype-phenotype interactions: Supplementary

Yong Chen<sup>1,2</sup>, Hengtong Wang<sup>3</sup>, Jiangang Zhang<sup>4</sup>, Ke Chen<sup>5</sup>, and Yuming Li<sup>1,+</sup>

<sup>1</sup>Key Laboratory of Digestive System Tumors of Gansu Province, Lanzhou University, Lanzhou 730000, China

<sup>2</sup>Center of Soft Matter Physics and its Applications, Beihang University, Beijing 100191, China

<sup>3</sup>School of Physics and Information Technology, Shaanxi Normal University, Xi'an 710119, China

<sup>4</sup>Institute of Pathology, Lanzhou University, Lanzhou 730000, China

<sup>5</sup>Key Laboratory of Genome Sciences and Information, Beijing Institute of Genomics, Chinese Academy of Sciences, Beijing 100101, China

## ABSTRACT

**Table S1.** Summary of input parameters for our model in simulations.

| Parameter                                                      | Symbol        | Value              |
|----------------------------------------------------------------|---------------|--------------------|
| Spatial size                                                   | $L_x, L_y$    | 401                |
| Spatial step                                                   | $h$           | 0.1                |
| Time period of cell cycle                                      | $\tau$        | 1                  |
| Time step                                                      | $\Delta t$    | $0.01\tau$         |
| Total simulation time                                          | $t_{max}$     | $200\tau$          |
| Diffusion parameter of nutrient                                | $D$           | $1 \times 10^{-4}$ |
| Rate coefficient of nutrient consumption per cell              | $k$           | 0.02               |
| Degradation of ECM per cell                                    | $\gamma$      | $5 \times 10^{-4}$ |
| Criteria of nutrient for necrotic cell                         | $\phi_c$      | 0.02               |
| Shape parameter of proliferative probability                   | $\theta_p$    | 0.2                |
| Shape parameter of invasive probability                        | $\theta_i$    | 0.2                |
| Inhabitation of proliferation from proliferative cell          | $\alpha_{pp}$ | $0 \sim -0.95^*$   |
| Inhabitation of proliferation from invasive proliferative cell | $\alpha_{pi}$ | -0.02              |
| Enhancement of migration from proliferative cell               | $\beta_{ip}$  | 0.02               |
| Enhancement of migration from invasive cell                    | $\beta_{ii}$  | $0 \sim 0.95^*$    |

\* with interval 0.05.

## Supplementary Figures

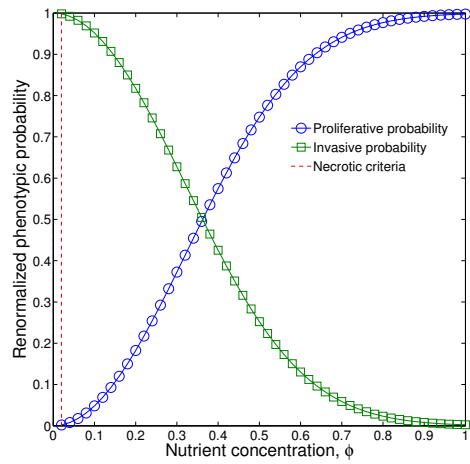

**Figure S1.** An example of renormalized proliferative and invasive probabilities for a cell in the spatial grid following by Eqs. (3-4). Here, the living cell count  $N_T = 3$ , the shape parameters  $\theta_p = \theta_i = 0.2$ . The phenotypic parameters in Table 1 are  $\alpha_{pp} = -0.1$ ,  $\beta_{ii} = 0.1$ ,  $\alpha_{pi} = -0.02$ , and  $\beta_{ip} = 0.02$ . The blue circled line is the proliferative probability and the green one is of invasive cell. The red dashed line denotes the nutrient criterion of necrotic phenotype  $\phi_c = 0.02$ .

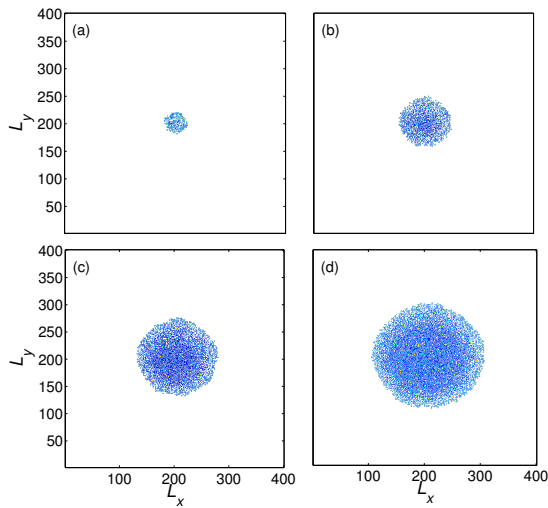

**Figure S2.** Snapshots of necrotic cells in growing tumor based on our simulation at different times, (a)  $t = 50 \tau$ , (b)  $t = 100 \tau$ , (c)  $t = 150 \tau$ , (d)  $t = 200 \tau$ . Here, the living cells and ECM have been removed. Parameters are the same as those in Figure 3.

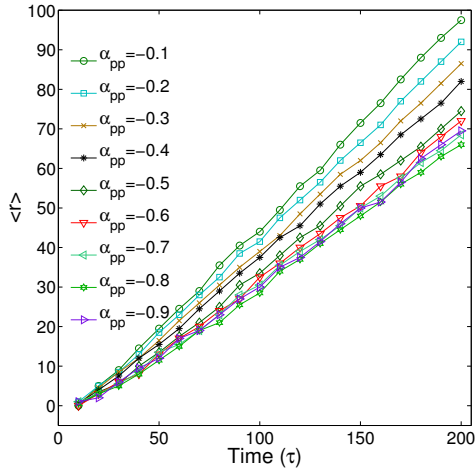

**Figure S3. The average radial distance  $\langle r \rangle$  again time  $t$ .**  $\langle r \rangle$  increases linearly with  $t$ . It means the tumor grows with constant radial velocity  $v$ . Note that  $v$  decreases with increasing the inhibition degree  $\alpha_{pp}$  except for  $\alpha_{pp} = -0.9$ . Here, the parameter  $\beta_{ii} = 0.1$  and the others are in Table S1.

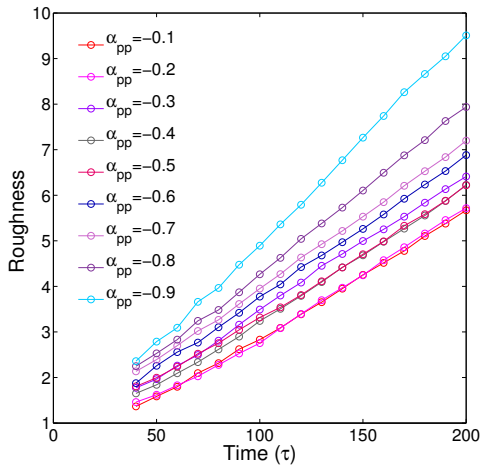

**Figure S3. The average roughness  $\langle R \rangle$  again time  $t$ .**  $\langle R \rangle$  increases linearly with  $t$ . It means the surface roughness grows with constant velocity which increases with the inhibition degree  $\alpha_{pp}$ . Here, the parameter  $\beta_{ii} = 0.1$  and the others are in Table S1.

**Text S1.** The numerical scheme for Eqs. (1-2).

In this study, the nutrient diffusion equations Eq. (1) is a nonlinear parabolic partial differential equation in two-dimensional space under the conditions Eqs. (2). In the case of one-dimensional space, the similar general parabolic equation is<sup>1</sup>

$$\partial_t u = a \partial_{xx} U + bu, \quad 0 < x < 1, \quad t > 0. \quad (\text{S.1})$$

The initial and boundary conditions are

$$\begin{aligned} u(x, 0) &= g(x), & 0 \leq x \leq 1 \\ u(0, t) &= \psi(t), & t \geq 0 \\ u(1, t) &= \phi(t), & t \geq 0. \end{aligned}$$

For this class of numerical problem, the differences of Eq. (S.1) are

$$\begin{aligned} \partial_t u|_j^n &= \frac{u_j^{n+1} - u_j^n}{\tau} + O(\tau) \\ \partial_{xx} u|_j^n &= \frac{1}{h} \left( \partial_x u|_{j+1/2}^n - \partial_x u|_{j-1/2}^n \right) + O(h^2) \\ \partial_x u|_{j-1/2}^n &= \partial_x u|_{j-1/2}^{n+1} - \tau \partial_x \partial_t u|_{j-1/2}^{n+\theta\tau}, \quad 0 \leq \theta \leq 1. \end{aligned}$$

Here,  $u_j^n$  denotes the value of function  $u$  at  $(x_j, t_n)$ .  $\tau$  and  $h$  represent the time and spatial step size, respectively. Substituting the above equations to Eq. (S.1), we have

$$\frac{u_j^{n+1} - u_j^n}{\tau} = \frac{a}{h} \left( \partial_x u|_{j+1/2}^n - \partial_x u|_{j-1/2}^n \right) + bu_j^n + O(\tau + h^2). \quad (\text{S.2})$$

Considering the central differences as below

$$\begin{aligned} \partial_x u|_{j+1/2}^n &= \frac{1}{h} (u_{j+1}^n - u_j^n) + O(h^2), \\ \partial_x u|_{j-1/2}^n &= \frac{1}{h} (u_j^{n+1} - u_{j-1}^{n+1}) + O(h^2), \end{aligned}$$

a highly efficient quasi-Saul'ev difference scheme for one-dimensional Eq. (S.1) is deduced,<sup>1-5</sup>

$$\frac{u_j^{n+1} - u_j^n}{\tau} = \frac{a}{h^2} \left( u_{j+1}^n - u_j^n - u_j^{n+1} + u_{j-1}^{n+1} \right) + bu_j^n + O(\tau + h^2). \quad (\text{S.3})$$

A reduced form of two-dimensional parabolic equation used in our simulation could be described by

$$\partial_t u = a(\partial_{xx} + \partial_{yy})u + bu. \quad (\text{S.4})$$

With extending the difference scheme of Eq. (S.3), we deduce the numerical scheme,

$$\frac{u_{j,l}^{n+1} - u_{j,l}^n}{\tau} = \frac{a}{h^2} \left( u_{j+1,l}^n - u_{j,l}^n - u_{j,l}^{n+1} + u_{j-1,l}^{n+1} \right) + \frac{a}{h^2} \left( u_{j,l+1}^n - u_{j,l}^n - u_{j,l}^{n+1} + u_{j,l-1}^{n+1} \right) + bu_{j,l}^n + O(\tau + h^2). \quad (\text{S.5})$$

After sorting out the above equation, we obtain the final iterative scheme performed in our simulations,

$$u_{j,l}^{n+1} = \frac{1 + b\tau - 2\lambda}{1 + 2\lambda} u_{j,l}^n + \frac{\lambda}{1 + 2\lambda} \left( u_{j+1,l}^n + u_{j,l+1}^n + u_{j-1,l}^{n+1} + u_{j,l-1}^{n+1} \right), \quad (\text{S.6})$$

where  $\lambda = a\tau/h^2$ .

## References

1. Jinpu Lu and Zhi Guan, *Numerical algorithm of partial differential equations* (in Chinese), 2nd edition (Tsinghua press, Beijing, 2003).
2. A. A. Medovikov, High order explicit methods for parabolic equations, *BIT Numerical Mathematics* **38**, 372 (1998).
3. V. K. Saul'ev, On a method of numerical integration of the equation of diffusion, *Dokl. Akad. Nauk SSSR (NS)* **185**, 1077 (1957).
4. V. K. Saul'ev, A new difference method for the numerical solution of fourth-order parabolic equations, *U.S.S.R Comput. Maths. Math. Phys.* **26**, 147 (1986).
5. V. K. Saul'ev, Integration of equations of parabolic type by the method of nets, *International series of monographs in pure and applied mathematics*, Vol. **54**, Pergamon Press (Oxford 1964).
